# Supplementary material
Source: publisher site journal article supplement (https://www.dovepress.com/article/266720)
Supplement: Supplementary file 1 [file get_supplementary_file.php]

Appendix:

1. "Action observation training"[All Fields] OR "Action observation treatment"[All Fields] AND "upper limb functions"[All Fields] OR "movement execution"[All Fields] OR "physical training"[All Fields] AND "unilateral cerebral palsy"[All Fields] OR "cerebral palsy"[All Fields] AND "randomized controlled trial"[All Fields] AND ("2010/01/01"[PubDate] : "2020/05/21"[PubDate])
2. "Action observation training"[All Fields] OR "Action observation treatment"[All Fields] AND "upper limb functions"[All Fields] OR "movement execution"[All Fields] OR "physical training"[All Fields] AND "unilateral cerebral palsy"[All Fields] OR "cerebral palsy"[All Fields] AND "randomized controlled trial"[All Fields] AND ("has associated data"[Filter] AND ("2010/01/01"[PubDate] : "2020/05/21"[PubDate]))
3. 1 & 2
